# Supplementary material for: High Frequency of Self-Diagnosis and Self-Treatment in a Nationally Representative Survey about Superficial Fungal Infections in Adults—United States, 2022
Source: MDPI journal article supplement (doi:10.3390/jof9010019), 2022-12-22
Supplement: s1 [file s1]

**Supplemental Table S1:** Ringworm and fungal nail infection questions and response options—Porter Novelli Summer ConsumerStyles Survey, United States, 2022

| Question                                                                                                                                                                                                | Response options                                                                                                                                                                                                                                                                                                                                                         |
|---------------------------------------------------------------------------------------------------------------------------------------------------------------------------------------------------------|--------------------------------------------------------------------------------------------------------------------------------------------------------------------------------------------------------------------------------------------------------------------------------------------------------------------------------------------------------------------------|
| 1. Have you ever heard of the following infections?<br><i>Select all that apply.</i>                                                                                                                    | <ul style="list-style-type: none"> <li>• Ringworm</li> <li>• Tinea</li> <li>• Athlete's foot</li> <li>• Jock itch</li> <li>• Dermatophytosis</li> <li>• Fungal nail infection</li> <li>• None of these</li> </ul>                                                                                                                                                        |
| 2. In the past 12 months, have you had any of the following infections? Ringworm is sometimes known as "tinea," "athlete's foot," or "jock itch." <i>Select all that apply.</i>                         | <ul style="list-style-type: none"> <li>• Ringworm, not diagnosed by a healthcare provider</li> <li>• Ringworm, diagnosed by a healthcare provider</li> <li>• Fungal nail infection, not diagnosed by a healthcare provider</li> <li>• Fungal nail infection, diagnosed by a healthcare provider</li> <li>• None of these</li> <li>• Don't know/don't remember</li> </ul> |
| 3. <i>Among respondents who had ringworm:</i><br>In the past 12 months, which of the following places on your body did you have ringworm?<br><i>Select all that apply.</i>                              | <ul style="list-style-type: none"> <li>• Foot ("athlete's foot")</li> <li>• Groin/inner thighs/buttocks ("jock itch")</li> <li>• Scalp</li> <li>• Face</li> <li>• Hand</li> <li>• Somewhere else on the body</li> <li>• Don't know/don't remember</li> </ul>                                                                                                             |
| 4. <i>Among respondents who had ringworm:</i><br>Which of the following antifungal treatments did you use to treat your ringworm infection?<br><i>Select all that apply.</i>                            | <ul style="list-style-type: none"> <li>• Non-prescription cream, powder, etc.</li> <li>• Prescription cream, powder, etc.</li> <li>• Prescription medicine taken by mouth</li> <li>• Alternative or natural treatment</li> <li>• None of the above</li> </ul>                                                                                                            |
| 5. <i>Among respondents who had a fungal nail infection:</i><br>Which of the following antifungal treatments did you use to treat your fungal nail infection?<br><i>Select all that apply.</i>          | <ul style="list-style-type: none"> <li>• Non-prescription cream, powder, etc.</li> <li>• Prescription cream, powder, etc.</li> <li>• Prescription medicine taken by mouth</li> <li>• Alternative or natural treatment</li> <li>• None of the above</li> </ul>                                                                                                            |
| 6. <i>Among respondents who had ringworm or a fungal nail infection:</i><br>Which of the following issues or complications did you have as a result of your infection?<br><i>Select all that apply.</i> | <ul style="list-style-type: none"> <li>• Bacterial infection ("cellulitis")</li> <li>• Permanent skin or nail damage</li> <li>• Side effects from treatment</li> <li>• Treatment did not cure infection</li> <li>• None of these</li> </ul>                                                                                                                              |

**Supplemental Table S2:** Ever heard of any of the fungal infection terms listed on the survey<sup>1</sup>—Porter Novelli Summer ConsumerStyles Survey, United States, 2022

|                                 | Yes (n = 3,573)        | No (n = 567)           |         |
|---------------------------------|------------------------|------------------------|---------|
| Characteristic                  | n (%)                  | n (%)                  | p-value |
| Mean, median age in years (IQR) | 49.4, 49.2 (33.5–63.4) | 39.6, 40.0 (24.9–49.4) | <0.001  |
| Age category in years           |                        |                        | <0.001  |
| 18–34                           | 936 (26.2%)            | 267 (47.1%)            |         |
| 35–44                           | 570 (16.0%)            | 116 (20.5%)            |         |

|                                                                               |                    |                    |        |
|-------------------------------------------------------------------------------|--------------------|--------------------|--------|
| 45–54                                                                         | 587 (16.4%)        | 62 (10.9%)         |        |
| 55–64                                                                         | 627 (17.5%)        | 59 (10.4%)         |        |
| 65 and older                                                                  | 851 (23.8%)        | 63 (11.1%)         |        |
| Gender <sup>2</sup>                                                           |                    |                    | 0.646  |
| Male                                                                          | 1,721 (48.3%)      | 279 (49.6%)        |        |
| Female                                                                        | 1,844 (51.7%)      | 283 (50.3%)        |        |
| Race/ethnicity                                                                |                    |                    | 0.005  |
| White, non-Hispanic                                                           | 2,293 (64.2%)      | 304 (53.6%)        |        |
| Black, non-Hispanic                                                           | 419 (11.7%)        | 74 (13.1%)         |        |
| Other/multiple race, non-Hispanic                                             | 289 (8.1%)         | 65 (11.5%)         |        |
| Hispanic                                                                      | 571 (16.0%)        | 124 (21.9%)        |        |
| Education                                                                     |                    |                    | 0.013  |
| High school or less                                                           | 1,314 (36.8%)      | 251 (44.2%)        |        |
| Some college or more                                                          | 2,259 (63.2%)      | 316 (55.7%)        |        |
| Mean, median number of people in household (IQR)                              | 2.9, 2.0 (1.8–3.3) | 3.2, 2.5 (1.4–3.8) | 0.003  |
| Have children living in household                                             | 1,026 (28.7%)      | 207 (36.5%)        | 0.006  |
| Employed                                                                      | 2,117 (59.2%)      | 357 (63.0%)        | 0.215  |
| Household income                                                              |                    |                    | 0.412  |
| \$0 to \$24,999                                                               | 441 (12.3%)        | 89 (15.7%)         |        |
| \$25,000 to \$74,999                                                          | 1,200 (33.6%)      | 179 (31.6%)        |        |
| \$75,000 to \$149,999                                                         | 1,116 (31.2%)      | 174 (30.7%)        |        |
| \$150,000 or more                                                             | 815 (22.8%)        | 125 (22.0%)        |        |
| Mean, median number of healthcare provider visits in the past 12 months (IQR) | 4.4, 1.9 (0.4–4.5) | 4.6, 1.2 (0.0–3.5) | 0.769  |
| Health conditions in the past 12 months                                       |                    |                    |        |
| Diabetes                                                                      | 440 (12.3%)        | 36 (6.3%)          | <0.001 |
| No health conditions                                                          | 767 (21.5%)        | 229 (40.4%)        | <0.001 |
| Metropolitan Statistical Area category                                        |                    |                    | 0.882  |
| Non-metropolitan                                                              | 480 (13.4%)        | 74 (13.1%)         |        |
| Metropolitan                                                                  | 3,093 (86.6%)      | 493 (86.9%)        |        |
| Community type                                                                |                    |                    | 0.003  |
| Urban                                                                         | 1,225 (34.3%)      | 230 (40.6%)        |        |
| Rural                                                                         | 656 (18.4%)        | 63 (11.1%)         |        |
| Suburban                                                                      | 1,689 (47.3%)      | 273 (48.1%)        |        |
| Census region                                                                 |                    |                    | 0.160  |
| Northeast                                                                     | 633 (17.7%)        | 80 (14.1%)         |        |
| Midwest                                                                       | 727 (20.3%)        | 131 (23.1%)        |        |
| South                                                                         | 1,379 (38.6%)      | 204 (36.0%)        |        |
| West                                                                          | 834 (23.3%)        | 153 (27.0%)        |        |

IQR = interquartile range

<sup>1</sup> n missing response = 13. In total, 3,225 (77.6%) had heard of ringworm, 665 (16.0%) had heard of tinea, 3,432 (82.6%) had heard of athlete's foot, 2,837 (68.3%) had heard of jock itch, 416 (10.0%) had heard of dermatophytosis, 3,044 (73.2%) had heard of fungal nail infection, and 567 (13.6%) had not heard of any of these terms.

<sup>2</sup> Eleven respondents answered "prefer to self-describe".
